# Supplementary material for: Association of race and ethnicity with clinical phenotype, genetics, and survival in pediatric acute myeloid leukemia
Source: PubMed Central journal article supplement — Blood Adv. 2021 Dec 2;5(23):4992–5001. doi: 10.1182/bloodadvances.2021004735 (PMC9153027; doi:10.1182/bloodadvances.2021004735), 2021-12-02

*Association of race and ethnicity with clinical phenotype, genetics, and survival in pediatric acute myeloid leukemia*

**Supplementary materials**

**Supplementary table 1. Characteristics of patients with *KMT2Ar* AML**

|                                 | <b>White non-Hispanic<br/>(N=123)</b> | <b>Black<br/>(N=25)</b> | <b>Hispanic<br/>(N=21)</b> | <b>p value</b> |
|---------------------------------|---------------------------------------|-------------------------|----------------------------|----------------|
| <b>Male sex</b>                 | 65 (52.8)                             | 11 (44.0)               | 8 (38.1)                   | 0.38           |
| <b>Age at diagnosis</b>         | 3.3 (0.9, 11.9)                       | 11.7 (2.3, 15.1)        | 2.7 (1.1, 8.5)             | 0.04           |
| <b>Mutations</b>                |                                       |                         |                            |                |
| <i>FLT3</i>                     | 8 (6.5)                               | 2 (8.3)                 | 1 (4.8)                    | 0.89           |
| <i>NPM1</i>                     | 0                                     | 0                       | 0                          |                |
| <i>CEBPA</i>                    | 0                                     | 0                       | 0                          |                |
| <i>cKIT</i> (exon 8)            | 0                                     | 0                       | 0                          |                |
| <i>cKIT</i> (exon 17)           | 0                                     | 0                       | 0                          |                |
| <b>Treatment protocol</b>       |                                       |                         |                            | 0.19           |
| AAML0531                        | 107 (87.0%)                           | 18 (72.0%)              | 19 (90.5%)                 |                |
| AAML03P1                        | 9 (7.3%)                              | 3 (12.0%)               | 2 (9.5%)                   |                |
| CCG-2961                        | 7 (5.7%)                              | 4 (16.0%)               | 0 (0.0%)                   |                |
| <b>WBC at diagnosis</b>         | 40.5 (11.4, 101.8)                    | 46.0 (18.5, 96.1)       | 89.0 (25.6, 210.9)         | 0.19           |
| <b>CNS disease at diagnosis</b> | 8 (6.5%)                              | 1 (4.0%)                | 0                          | 0.45           |
| <b>MRD at end of course 1</b>   |                                       |                         |                            | 0.36           |
| Positive                        | 15 (12.2%)                            | 6 (24.0%)               | 5 (23.8%)                  |                |
| Negative                        | 83 (67.5%)                            | 13 (52.0%)              | 13 (61.9%)                 |                |
| Unknown                         | 25 (20.3%)                            | 6 (24.0%)               | 3 (14.3%)                  |                |
| <b>MRD at end of course 2</b>   |                                       |                         |                            | 0.43           |
| Positive                        | 11 (8.9%)                             | 3 (12.0%)               | 3 (14.3%)                  |                |
| Negative                        | 73 (59.3%)                            | 10 (40.0%)              | 12 (57.1%)                 |                |
| Unknown                         | 39 (31.7%)                            | 12 (48.0%)              | 6 (28.6%)                  |                |
| <b>HSCT at first CR</b>         | 18 (14.6%)                            | 1 (4.0%)                | 4 (19.0%)                  | 0.27           |

Categorical data are n (%). Continuous data are median (interquartile range).

Abbreviations: WBC, white blood cell; CNS, central nervous system; MRD, minimal residual disease; HSCT, hematopoietic stem cell transplant; CR, complete response

**Supplementary Table 2. Characteristics of patients with Core Binding Factor AML**

|                                                                                                                                                                                                                                                    | White non-Hispanic<br>(N=135) | Black<br>(N=34)   | Hispanic (N=48)   | p value         |
|----------------------------------------------------------------------------------------------------------------------------------------------------------------------------------------------------------------------------------------------------|-------------------------------|-------------------|-------------------|-----------------|
| <b>Male sex</b>                                                                                                                                                                                                                                    | 76 (56.3%)                    | 15 (44.1%)        | 23 (46.9%)        | 0.31            |
| <b>Age at diagnosis</b>                                                                                                                                                                                                                            | 11.9 (7.4, 15.7)              | 11.5 (7.2, 13.4)  | 10.1 (5.8, 14.2)  | 0.23            |
| <b>Mutations</b>                                                                                                                                                                                                                                   |                               |                   |                   |                 |
| <i>FLT3</i>                                                                                                                                                                                                                                        | 7 (5.2%)                      | 3 (8.8%)          | 3 (6.1%)          | 0.73            |
| <i>NPM1</i>                                                                                                                                                                                                                                        | 0 (0.0%)                      | 1 (2.9%)          | 0                 | 0.22            |
| <i>CEBPA</i>                                                                                                                                                                                                                                       | 1 (0.7%)                      | 0                 | 0                 | 0.80            |
| <i>cKIT</i> (exon 8)                                                                                                                                                                                                                               | 22 (16.3%)                    | 7 (20.6%)         | 3 (6.1%)          | 0.39            |
| <i>cKIT</i> (exon 17)                                                                                                                                                                                                                              | 16 (11.9%)                    | 0                 | 6 (12.2%)         | 0.29            |
| <b>Treatment protocol</b>                                                                                                                                                                                                                          |                               |                   |                   | <b>0.01</b>     |
| AAML0531                                                                                                                                                                                                                                           | 112 (83.0%)                   | 25 (73.5%)        | 44 (89.8%)        |                 |
| AAML03P1                                                                                                                                                                                                                                           | 15 (11.1%)                    | 2 (5.9%)          | 5 (10.2%)         |                 |
| CCG-2961                                                                                                                                                                                                                                           | 8 (5.9%)                      | 7 (20.6%)         | 0                 |                 |
| <b>WBC at diagnosis</b>                                                                                                                                                                                                                            |                               |                   |                   | 0.32            |
| Median (IQR)                                                                                                                                                                                                                                       | 47.9 (16.4, 84.0)             | 28.1 (15.3, 45.3) | 40.6 (14.5, 76.5) |                 |
| <b>CNS disease at diagnosis</b>                                                                                                                                                                                                                    | 10 (7.4%)                     | 6 (17.6%)         | 6 (12.2%)         | 0.18            |
| <b>MRD at end of course 1</b>                                                                                                                                                                                                                      |                               |                   |                   | 0.01            |
| Positive                                                                                                                                                                                                                                           | 17 (12.6%)                    | 7 (20.6%)         | 2 (4.1%)          |                 |
| Negative                                                                                                                                                                                                                                           | 87 (64.4%)                    | 14 (41.2%)        | 38 (77.6%)        |                 |
| Unknown                                                                                                                                                                                                                                            | 31 (23.0%)                    | 13 (38.2%)        | 9 (18.4%)         |                 |
| <b>MRD at end of course 2</b>                                                                                                                                                                                                                      |                               |                   |                   | <b>&lt;0.01</b> |
| Positive                                                                                                                                                                                                                                           | 3 (2.2%)                      | 5 (14.7%)         | 2 (4.1%)          |                 |
| Negative                                                                                                                                                                                                                                           | 94 (69.6%)                    | 13 (38.2%)        | 35 (71.4%)        |                 |
| Unknown                                                                                                                                                                                                                                            | 38 (28.1%)                    | 16 (47.1%)        | 12 (24.5%)        |                 |
| <b>HSCT at first CR</b>                                                                                                                                                                                                                            | 1 (0.7%)                      | 0                 | 0                 | 0.73            |
| Categorical data are n (%). Continuous data are median (interquartile range).<br>Abbreviations: WBC, white blood cell; CNS, central nervous system; MRD, minimal residual disease; HSCT, hematopoietic stem cell transplant; CR, complete response |                               |                   |                   |                 |

**Supplementary Table 3. Sensitivity analysis of survival outcomes with and without patients treated on CCG-2961**

| <b>Race-ethnicity</b>                                                                                                                                                                                                                                                                                                                                                        | <b>Event free survival<br/>HR (95% CI)</b>         | <b>Overall survival<br/>HR (95% CI)</b>            |
|------------------------------------------------------------------------------------------------------------------------------------------------------------------------------------------------------------------------------------------------------------------------------------------------------------------------------------------------------------------------------|----------------------------------------------------|----------------------------------------------------|
| All cytogenetic subgroups<br>(n = 769)                                                                                                                                                                                                                                                                                                                                       |                                                    |                                                    |
| White non-Hispanic                                                                                                                                                                                                                                                                                                                                                           | ref                                                | ref                                                |
| Black                                                                                                                                                                                                                                                                                                                                                                        | <b>1.61 (1.22-2.12)</b><br><b>1.57 (1.21-2.04)</b> | <b>2.10 (1.54-2.87)</b><br><b>1.97 (1.47-2.65)</b> |
| Hispanic                                                                                                                                                                                                                                                                                                                                                                     | <b>1.09 (0.84-1.40)</b><br>1.04 (0.81-1.34)        | <b>1.29 (0.95-1.73)</b><br>1.22 (0.91-1.63)        |
| <i>KMT2Ar</i><br>(n = 109)                                                                                                                                                                                                                                                                                                                                                   |                                                    |                                                    |
| White non-Hispanic                                                                                                                                                                                                                                                                                                                                                           | ref                                                | ref                                                |
| Black                                                                                                                                                                                                                                                                                                                                                                        | <b>2.14 (1.13-4.08)</b><br><b>2.31 (1.41-3.79)</b> | <b>2.60 (1.31-5.17)</b><br><b>2.54 (1.43-4.51)</b> |
| Hispanic                                                                                                                                                                                                                                                                                                                                                                     | <b>2.40 (1.23-4.67)</b><br><b>2.20 (1.27-3.80)</b> | <b>1.66 (0.77-3.61)</b><br><b>2.07 (1.09-3.93)</b> |
| t(8;21) or inv(16)<br>(n = 203)                                                                                                                                                                                                                                                                                                                                              |                                                    |                                                    |
| White non-Hispanic                                                                                                                                                                                                                                                                                                                                                           | ref                                                | ref                                                |
| Black                                                                                                                                                                                                                                                                                                                                                                        | <b>1.79 (0.98-3.26)</b><br><b>1.93 (1.14-3.28)</b> | <b>3.22 (1.47-7.05)</b><br><b>3.24 (1.60-6.57)</b> |
| Hispanic                                                                                                                                                                                                                                                                                                                                                                     | <b>1.02 (0.58-1.77)</b><br>0.99 (0.57-1.71)        | <b>2.14 (1.04-4.41)</b><br>2.03 (1.00 – 4.10)      |
| <p>Sensitivity analysis excluding patients in CCG-2961 is in <b>orange</b>, and original analysis (Table 2 of manuscript) is in <b>black</b>.<br/>           Estimates where significance has dropped below <math>\alpha = 0.05</math> are italicized<br/>           Statistically significant results are bolded<br/>           Abbreviations: CI = confidence interval</p> |                                                    |                                                    |

**Supplementary Table 4. Sensitivity analysis of survival outcomes with and without patients experiencing early mortality (< 50 days)**

| <b>Race-ethnicity</b>                                                                                                                                                                                                                                                                                                                                                            | <b>Event free survival<br/>HR (95% CI)</b>         | <b>Overall survival<br/>HR (95% CI)</b>            |
|----------------------------------------------------------------------------------------------------------------------------------------------------------------------------------------------------------------------------------------------------------------------------------------------------------------------------------------------------------------------------------|----------------------------------------------------|----------------------------------------------------|
| All cytogenetic subgroups<br>(n = 793)                                                                                                                                                                                                                                                                                                                                           |                                                    |                                                    |
| White non-Hispanic                                                                                                                                                                                                                                                                                                                                                               | ref                                                | ref                                                |
| Black                                                                                                                                                                                                                                                                                                                                                                            | <b>1.49 (1.14-1.95)</b><br><b>1.57 (1.21-2.04)</b> | <b>1.86 (1.36-2.54)</b><br><b>1.97 (1.47-2.65)</b> |
| Hispanic                                                                                                                                                                                                                                                                                                                                                                         | <b>1.01 (0.78-1.31)</b><br>1.04 (0.81-1.34)        | <b>1.18 (0.87-1.60)</b><br>1.22 (0.91-1.63)        |
| <i>KMT2Ar</i><br>(n = 165)                                                                                                                                                                                                                                                                                                                                                       |                                                    |                                                    |
| White non-Hispanic                                                                                                                                                                                                                                                                                                                                                               | ref                                                | ref                                                |
| Black                                                                                                                                                                                                                                                                                                                                                                            | <b>2.32 (1.40-3.84)</b><br><b>2.31 (1.41-3.79)</b> | <b>2.56 (1.42-4.63)</b><br><b>2.54 (1.43-4.51)</b> |
| Hispanic                                                                                                                                                                                                                                                                                                                                                                         | <b>2.02 (1.14-3.61)</b><br><b>2.20 (1.27-3.80)</b> | <b>1.83 (0.92-3.66)</b><br><b>2.07 (1.09-3.93)</b> |
| t(8;21) or inv(16)<br>(n = 212)                                                                                                                                                                                                                                                                                                                                                  |                                                    |                                                    |
| White non-Hispanic                                                                                                                                                                                                                                                                                                                                                               | ref                                                | ref                                                |
| Black                                                                                                                                                                                                                                                                                                                                                                            | <b>1.68 (0.96-2.30)</b><br><b>1.93 (1.14-3.28)</b> | <b>2.69 (1.24-5.83)</b><br><b>3.24 (1.60-6.57)</b> |
| Hispanic                                                                                                                                                                                                                                                                                                                                                                         | <b>0.95 (0.54-1.67)</b><br>0.99 (0.57-1.71)        | <b>1.99 (0.96-4.13)</b><br>2.03 (1.00 – 4.10)      |
| <p>Sensitivity analysis excluding patients with early death is in <b>orange</b>, and original analysis (Table 2 of manuscript) is in <b>black</b><br/>           Estimates where significance has dropped below <math>\alpha = 0.05</math> are italicized<br/>           Statistically significant results are bolded<br/>           Abbreviations: CI = confidence interval</p> |                                                    |                                                    |

**Supplementary Figure 1. Causal mediation analysis of relationship between Black race, t(6;11) cytogenetics, and overall survival**

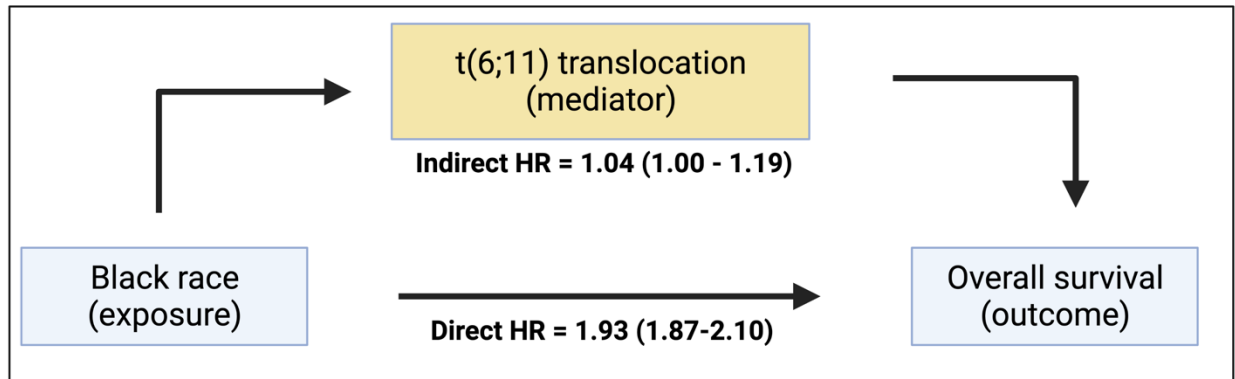

Supplement: advancesADV2021004735-suppl1.pdf [file advancesADV2021004735-suppl1.pdf]
